# Supplementary material for: Score to assess the probability of relapse in granulomatosis with polyangiitis and microscopic polyangiitis
Source: PubMed Central journal article supplement — RMD Open. 2023 Mar 27;9(1):e002953. doi: 10.1136/rmdopen-2022-002953 (PMC10069598; doi:10.1136/rmdopen-2022-002953), 2023-03-27
Supplement: rmdopen-2022-002953supp001.pdf [file rmdopen-2022-002953supp001.pdf]

## SUPPLEMENTARY FIGURE

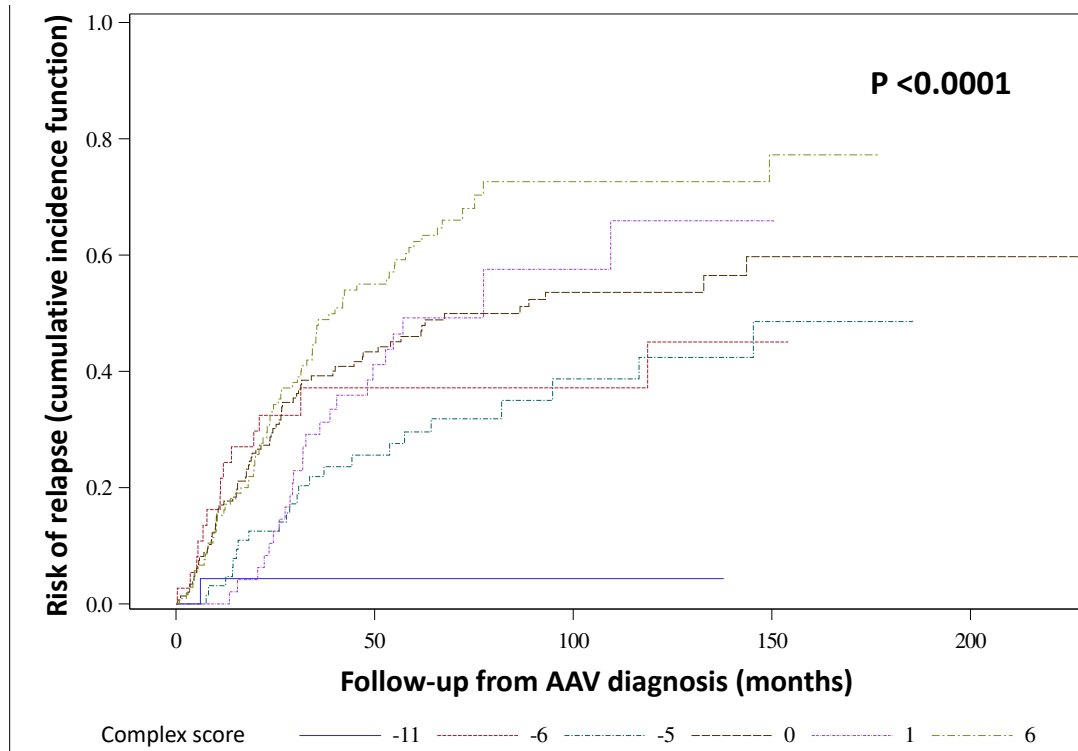

**Supplementary figure 1:** risk of relapse depending on the complex version of the score (development cohort)

**SUPPLEMENTARY TABLES****Supplementary table 1:** Area under the ROC curve to predict relapse in the validation cohort across follow-up from AAV diagnosis

| <b>Time of follow-up</b> | <b>ROC AUC (95% CI) of the complex score</b> | <b>ROC AUC (95% CI) of the FRS</b> | <b>P value</b> |
|--------------------------|----------------------------------------------|------------------------------------|----------------|
| <b>24 months</b>         | 0.56 (0.50-0.62)                             | 0.58 (0.52-0.64)                   | 0.0580         |
| <b>36 months</b>         | 0.60 (0.54-0.65)                             | 0.61 (0.55-0.65)                   | 0.2181         |
| <b>48 months</b>         | 0.59 (0.53-0.64)                             | 0.59 (0.54-0.65)                   | 0.3916         |
| <b>60 months</b>         | 0.61 (0.55-0.67)                             | 0.61 (0.56-0.66)                   | 0.9291         |
| <b>72 months</b>         | 0.66 (0.60-0.72)                             | 0.65 (0.59-0.70)                   | 0.2482         |
| <b>84 months</b>         | 0.68 (0.62-0.74)                             | 0.67 (0.61-0.72)                   | 0.1938         |

95 CI: 95% confidence interval

FRS: French Vasculitis Study Group Relapse Score
